# Supplementary material
Source: MDPI journal article supplement (https://www.mdpi.com/2313-433X/10/4/86)
Supplement: s1 [file s1]

# Denoising of Optical Coherence Tomography Images in Ophthalmology using deep learning: A systematic review

*H. Ahmed, Q. Zhang, R. Donnan and A. Alomainy*

**Table S1**

TABLE S1: LIST OF EXCLUDED STUDIES AND THE REASONS

| Author,<br>Year                  | Title                                                                                                                                         | Reason                                                     |
|----------------------------------|-----------------------------------------------------------------------------------------------------------------------------------------------|------------------------------------------------------------|
| <i>Dong, 2020 [1]</i>            | Optical coherence tomography image denoising using a generative adversarial network with speckle modulation                                   | The dataset and the splitting procedure were not explained |
| <i>Liu, 2021 [2]</i>             | Axial and horizontal registration guided speckle suppression in single-line HD mode for retinal optical coherence tomography images           | Did not use any deep learning approaches                   |
| <i>Cheng, 2021 [3]</i>           | Robust three-dimensional registration on optical coherence tomography angiography for speckle reduction and visualization                     |                                                            |
| <i>Cheong, 2020 [4]</i>          | DeshadowGAN: A Deep Learning Approach to Remove Shadows from Optical Coherence Tomography Images                                              | The dataset and the splitting procedure were not explained |
| <i>Liu, 2017 [5]</i>             | Patch-based denoising method using low-rank technique and targeted database for optical coherence tomography image                            | Did not use any deep learning approaches                   |
| <i>Daneshmand, 2021 [6]</i>      | Reconstruction of Optical Coherence Tomography Images Using Mixed Low Rank Approximation and Second Order Tensor Based Total Variation Method |                                                            |
| <i>Samieinasab, 2020 [7]</i>     | Multivariate Statistical Modeling of Retinal Optical Coherence Tomography                                                                     |                                                            |
| <i>Hu, 2020 [8]</i>              | Noise Redistribution and 3D Shearlet Filtering for Speckle Reduction in Optical Coherence Tomography                                          |                                                            |
| <i>Fang, 2012 [9]</i>            | Sparsity based denoising of spectral domain optical coherence tomography images                                                               |                                                            |
| <i>Chen, 2021 [10]</i>           | Optical coherence tomographic image denoising based on Chi-square similarity and fuzzy logic                                                  |                                                            |
| <i>Liu, 2020 [11]</i>            | Using a dual-tree complex wavelet transform for denoising an optical coherence tomography angiography blood vessel image                      |                                                            |
| <i>Gomez-Valverde, 2021 [12]</i> | Adaptive compounding speckle-noise-reduction filter for optical coherence tomography images                                                   |                                                            |
| <i>Esmaili, 2020 [13]</i>        | Three-dimensional curvelet-based dictionary learning for speckle noise removal of optical coherence tomography                                |                                                            |
| <i>Yu, 2022 [14]</i>             | A noise statistical distribution analysis-based two-step filtering mechanism for optical coherence tomography image despeckling               |                                                            |
| <i>Smitha, 2021 [15]</i>         | A nonlocal deep image prior model to restore optical coherence tomographic images from gamma distributed speckle noise                        | The dataset and the splitting procedure were not explained |
| <i>Chen, 2021 [16]</i>           | Fusion denoising algorithm of optical coherence tomography image based on point-estimated and block-estimated                                 | Did not use any deep learning approaches                   |

|                        |      |                                                                                                                                                                         |                                                            |
|------------------------|------|-------------------------------------------------------------------------------------------------------------------------------------------------------------------------|------------------------------------------------------------|
| <i>Fan, [17]</i>       | 2020 | OCT Image Restoration Using Non-Local Deep Image Prior                                                                                                                  | The outcome of the model was not adequately reported       |
| <i>Jorjandi, [18]</i>  | 2021 | Statistical modeling of retinal optical coherence tomography using the Weibull mixture model                                                                            | Did not use any deep learning approaches                   |
| <i>Paul, [19]</i>      | 2019 | Speckle Removal Using Diffusion Potential for Optical Coherence Tomography Images                                                                                       |                                                            |
| <i>Wong, [20]</i>      | 2010 | General Bayesian estimation for speckle noise reduction in optical coherence tomography retinal imagery                                                                 |                                                            |
| <i>Cheng, [21]</i>     | 2016 | Speckle Reduction in 3D Optical Coherence Tomography of Retina by A-Scan Reconstruction                                                                                 |                                                            |
| <i>Thapa, [22]</i>     | 2015 | Reduction of speckle noise from optical coherence tomography images using multi-frame weighted nuclear norm minimization method                                         |                                                            |
| <i>Bian, [23]</i>      | 2015 | Multiframe denoising of high-speed optical coherence tomography data using interframe and intraframe priors                                                             |                                                            |
| <i>Cheng, [24]</i>     | 2015 | Speckle reduction in optical coherence tomography by matrix completion using bilateral random projection                                                                |                                                            |
| <i>Karri, [25]</i>     | 2016 | Simultaneous reconstruction and restoration of sparsely sampled optical coherence tomography image through learning separable filters for deep architectures            | The outcome of the model was not adequately reported       |
| <i>Lv, [26]</i>        | 2018 | Speckle noise reduction of multi-frame optical coherence tomography data using multi-linear principal component analysis                                                | Did not use any deep learning approaches                   |
| <i>Cheng, [27]</i>     | 2019 | Pixel Reconstruction For Speckle Reduction In 3D Optical Coherence Tomography Of Retina                                                                                 |                                                            |
| <i>Yoo, [28]</i>       | 2019 | Adaptive Weighted Nuclear Norm Minimization for Removing Speckle Noise from Optical Coherence Tomography Images                                                         |                                                            |
| <i>Husvagt, [29]</i>   | 2021 | Maximum a posteriori signal recovery for optical coherence tomography angiography image generation and denoising                                                        |                                                            |
| <i>Chitchian, [30]</i> | 2012 | Retinal optical coherence tomography image enhancement via shrinkage denoising using double-density dual-tree complex wavelet transform                                 |                                                            |
| <i>Kopriva, [31]</i>   | 2016 | Enhanced low-rank + sparsity decomposition for speckle reduction in optical coherence tomography                                                                        |                                                            |
| <i>Hu, [32]</i>        | 2019 | Selective retinex enhancement based on the clustering algorithm and block-matching 3D for optical coherence tomography images                                           |                                                            |
| <i>Huang, [33]</i>     | 2021 | Image Noise Recognition Algorithm Based on Improved DenseNet                                                                                                            | The outcome of the model was not adequately reported       |
| <i>Hu, [34]</i>        | 2022 | Unsupervised denoising of retinal OCT with diffusion probabilistic model                                                                                                | Did not use any deep learning approaches                   |
| <i>Yan, [35]</i>       | 2020 | Speckle reduction of OCT via super resolution reconstruction and its application on retinal layer segmentation                                                          |                                                            |
| <i>Gupta, [36]</i>     | 2022 | A De-Speckling Framework for Optical Coherence Tomography Images                                                                                                        |                                                            |
| <i>Huang, [37]</i>     | 2020 | Both speckle reduction and contrast enhancement for optical coherence tomography via sequential optimization in the logarithmic domain based on a refined Retinex model |                                                            |
| <i>Hu, [38]</i>        | 2021 | Noise reduction by adaptive-SIN filtering for retinal OCT images                                                                                                        |                                                            |
| <i>Li, [39]</i>        | 2021 | Speckle noise removal based on structural convolutional neural networks with feature fusion for medical image                                                           | The dataset and the splitting procedure were not explained |

|                               |                                                                                                                                                          |                                                                                                                     |
|-------------------------------|----------------------------------------------------------------------------------------------------------------------------------------------------------|---------------------------------------------------------------------------------------------------------------------|
| <i>P.S,</i> 2022<br>[40]      | Despeckling of OCT images using DT-CWT based fusion technique                                                                                            | Did not use any deep learning approaches                                                                            |
| <i>Amini,</i> 2019<br>[41]    | Speckle Noise Reduction and Enhancement for OCT Images                                                                                                   |                                                                                                                     |
| <i>Yu,</i> 2021 [42]          | A two-step filtering mechanism for speckle noise reduction in OCT images                                                                                 |                                                                                                                     |
| <i>Guo,</i> 2020<br>[43]      | Deep OCT image compression with convolutional neural networks                                                                                            | The dataset and the splitting procedure were not explained and the outcome of the model was not adequately reported |
| <i>Wu,</i> 2020<br>[44]       | Cooperative Low-Rank Models for Removing Stripe Noise From OCTA Images                                                                                   | Did not use any deep learning approaches                                                                            |
| <i>Das,</i> 2021<br>[45]      | A diagnostic information based framework for super-resolution and quality assessment of retinal OCT images                                               |                                                                                                                     |
| <i>Schirmacher,</i> 2017 [46] | QuaSI: Quantile Sparse Image Prior for Spatio-Temporal Denoising of Retinal OCT Data                                                                     |                                                                                                                     |
| <i>Huang,</i> 2021<br>[47]    | Cluster-based filtering framework for removing speckles with structural protection in OCT images                                                         |                                                                                                                     |
| <i>Yoo,</i> 2020<br>[48]      | CycleGAN-based deep learning technique for artifact reduction in fundus photography                                                                      | The dataset and the splitting procedure were not explained and the outcome of the model was not adequately reported |
| <i>Dong,</i> 2020<br>[49]     | Optical coherence tomography image de-noising using a generative adversarial network with speckle modulation                                             | The dataset and the splitting procedure were not explained                                                          |
| <i>Xu,</i> 2021 [50]          | Enhanced Visualization of Retinal Microvasculature via Deep Learning on OCTA Image Quality                                                               | The dataset and the splitting procedure were not explained and the outcome of the model was not adequately reported |
| <i>Menon,</i> 2019<br>[51]    | A Novel Deep Learning Approach for the Removal of Speckle Noise from Optical Coherence Tomography Images Using Gated Convolution–Deconvolution Structure | The dataset and the splitting procedure were not explained                                                          |
| <i>Gisbert,</i> 2020<br>[52]  | Self-supervised Denoising via Diffeomorphic Template Estimation: Application to Optical Coherence Tomography                                             | The dataset and the splitting procedure were not explained and the outcome of the model was not adequately reported |

Table S2

TABLE S2: RISK-OF-BIAS ASSESSMENT OF PAPERS REVIEWED

| Author, Year  | Reference | D1 | D2 | D3 | D4 |
|---------------|-----------|----|----|----|----|
| Devalla, 2019 | 53        |    |    |    |    |

|                   |    |  |  |  |  |
|-------------------|----|--|--|--|--|
| Cheong, 2021      | 54 |  |  |  |  |
| Tian, 2020        | 55 |  |  |  |  |
| Hu, 2020          | 56 |  |  |  |  |
| Akter, 2020       | 57 |  |  |  |  |
| Halupka, 2018     | 58 |  |  |  |  |
| Wei, 2018         | 59 |  |  |  |  |
| Chen, 2020        | 60 |  |  |  |  |
| Gour, 2020        | 61 |  |  |  |  |
| Hassan, 2021      | 62 |  |  |  |  |
| Ma, 2018          | 63 |  |  |  |  |
| Guo, 2020         | 64 |  |  |  |  |
| Qiu, 2020         | 65 |  |  |  |  |
| Huang, 2021       | 66 |  |  |  |  |
| Halupka, 2018     | 67 |  |  |  |  |
| Qiu, 2021         | 68 |  |  |  |  |
| Abassi, 2019      | 69 |  |  |  |  |
| Kande, 2020       | 70 |  |  |  |  |
| Qiu, 2020         | 71 |  |  |  |  |
| Shi, 2019         | 72 |  |  |  |  |
| Huang, 2020       | 73 |  |  |  |  |
| Yu, 2018          | 74 |  |  |  |  |
| Tajmirriahi, 2021 | 75 |  |  |  |  |
| Sengupta, 2021    | 76 |  |  |  |  |
| Mehdizadeh, 2021  | 77 |  |  |  |  |
| Cai, 2018         | 78 |  |  |  |  |
| Zhou, 2022        | 79 |  |  |  |  |
| Anoop, 2021       | 80 |  |  |  |  |
| Fu, 2021          | 81 |  |  |  |  |

|             |    |  |  |  |  |
|-------------|----|--|--|--|--|
| Wang, 2021  | 82 |  |  |  |  |
| Zhou, 2022  | 83 |  |  |  |  |
| Zhou, 2021  | 84 |  |  |  |  |
| Wu, 2021    | 85 |  |  |  |  |
| Das, 2020   | 86 |  |  |  |  |
| Huang, 2019 | 87 |  |  |  |  |
| Ge, 2022    | 88 |  |  |  |  |
| Ma, 2022    | 89 |  |  |  |  |
| Xie, 2022   | 90 |  |  |  |  |
| Xie, 2023   | 91 |  |  |  |  |
| Ahmed, 2022 | 92 |  |  |  |  |
| Ahmed, 2022 | 93 |  |  |  |  |
| Ahmed, 2022 | 94 |  |  |  |  |
| Zhou, 2023  | 95 |  |  |  |  |

## References

- [1] Z. Dong, G. Liu, G. Ni, J. Jerwick, L. Duan, C. Zhou. Optical coherence tomography image denoising using a generative adversarial network with speckle modulation. *Journal of Biophotonics*. 2020;13; e201960135.
- [2] M. Liu, X. Chen, B. Wang. Axial and horizontal registration guided speckle suppression in single-line HD mode for retinal optical coherence tomography images. *Optics Communications*. 2021;487;126807.
- [3] Y. Cheng, Z. Chu, R. K. Wang. Robust three-dimensional registration on optical coherence tomography angiography for speckle reduction and visualization. *Quant Imaging Med Surg*. 2021;11;879–894.
- [4] H. Cheong, S. K. Devalla, T. H. Pham, L. Zhang, M. J. A. Girard. DeshadowGAN: A Deep Learning Approach to Remove Shadows from Optical Coherence Tomography Images. *Translational Vision Science & Technology*. 2020;9;23-.
- [5] X. Liu, Z. Yang, J. Wang, J. Liu, K. Zhang, W. Hu. Patch-based denoising method using low-rank technique and targeted database for optical coherence tomography image. *Journal of Medical Imaging*. 2017;4;014002.
- [6] P. G. Daneshmand, A. Mehridehnavi, H. Rabbani. Reconstruction of Optical Coherence Tomography Images Using Mixed Low Rank Approximation and Second Order Tensor Based Total Variation Method. *IEEE Transactions on Medical Imaging*. 2021;40;865-878.
- [7] M. Samieinasab, Z. Amini, H. Rabbani. Multivariate Statistical Modeling of Retinal Optical Coherence Tomography. *IEEE Transactions on Medical Imaging*. 2020;39;3475-3487.
- [8] Y. Hu, J. Yang, J. Cheng, J. Liu. Noise Redistribution and 3D Shearlet Filtering for Speckle Reduction in Optical Coherence Tomography. *IEEE 17th International Symposium on Biomedical Imaging (ISBI)*. 2020;1565-1569.
- [9] L. Fang, S. Li, Q. Nie, J. A. Izatt, C. A. Toth and S. Farsiu, Sparsity based denoising of spectral domain optical coherence tomography images. *Biomedical Optics Express*. 2012;3;927-942.
- [10] H. Chen, S. Fu, H. Wang. Optical coherence tomographic image denoising based on Chi-square similarity and fuzzy logic. *Optics & Laser Technology*. 2021;143;107298.
- [11] H. Liu, S. Lin, C. Ye, D. Yu, J. Qin, L. An. Using a dual-tree complex wavelet transform for denoising an optical coherence tomography angiography blood vessel image. *OSA Continuum*. 2020;3;2630-2645.

- [12] J. J. Gomez-Valverde, C. Sinz, E. A. Rank, Z. Chen, A. Santos, W. Drexler, M. J. Ledesma-Carbayo. Adaptive compounding speckle-noise-reduction filter for optical coherence tomography images. *Journal of Biomedical Optics*. 2021;26;065001.
- [13] M. Esmaeili, A. M. Dehnavi, F. Hajizadeh, H. Rabbani. Three-dimensional curvelet-based dictionary learning for speckle noise removal of optical coherence tomography. *Biomedical Optics Express*. 2020;11;586-608.
- [14] X. Yu, C. Ge, M. Li, J. Chen, P. P. Shum. A noise statistical distribution analysis-based two-step filtering mechanism for optical coherence tomography image despeckling. *Laser Physics Letters*. 2022;19;075601.
- [15] A. Simtha and P. Jidesh. A nonlocal deep image prior model to restore optical coherence tomographic images from gamma distributed speckle noise. *Journal of Modern Optics*. 2021;68;1002-1017.
- [16] H. Chen. Fusion denoising algorithm of optical coherence tomography image based on point-estimated and block-estimated. *Optik*. 2021;225;165864.
- [17] W. Fan, H. Yu, T. Chen, S. Ji. OCT Image Restoration Using Non-Local Deep Image Prior. *Electronics*. 2020;9;784.
- [18] S. Jorjandi, Z. Amini, G. Plonka, H. Rabbani. Statistical modeling of retinal optical coherence tomography using the Weibull mixture model. *Biomedical Optics Express*. 2021;12;5470-5488.
- [19] A. Paul, D. P. Mukherjee, S. T. Acton. Speckle Removal Using Diffusion Potential for Optical Coherence Tomography Images. *IEEE Journal of Biomedical and Health Informatics*. 2019;23;264-272.
- [20] A. Wong, A. Mishra, K. Bizheva, D. A. Clausi. General Bayesian estimation for speckle noise reduction in optical coherence tomography retinal imagery. *Optics Express*. 2010;18;8338-8352.
- [21] J. Cheng, D. Tao, Y. Quan, D. W. K. Wong, G. C. M. Cheung, M. Akiba, J. Liu. Speckle Reduction in 3D Optical Coherence Tomography of Retina by A-Scan Reconstruction. *IEEE Transactions on Medical Imaging*. 2016;35;2270-2279.
- [22] D. Thapa, K. Raahemifar, V. Lakshminarayanan. Reduction of speckle noise from optical coherence tomography images using multi-frame weighted nuclear norm minimization method. *Journal of Modern Optics*. 2015;62;1856-18864.
- [23] L. Bian, J. Suo, F. Chen, Q. Dai. Multiframe denoising of high-speed optical coherence tomography data using interframe and intraframe priors. *Journal of Biomedical Optics*. 2015;20;036006.
- [24] J. Cheng, L. Duan, D. W. K. Wong, M. Akiba, J. Liu. Speckle reduction in optical coherence tomography by matrix completion using bilateral random projection. *36th Annual International Conference of the IEEE Engineering in Medicine and Biology Society*. 2014;186-189.
- [25] S. P. K. Karri, N. Garai, D. Nawn, S. Ghosh, D. Chakraborty, J. Chatterjee. Simultaneous reconstruction and restoration of sparsely sampled optical coherence tomography image through learning separable filters for deep architectures. *IEEE Students' Technology Symposium (TechSym)*. 2016;52-55.
- [26] H. Lv, S. Fu, C. Zhang, L. Zhai. Speckle noise reduction of multi-frame optical coherence tomography data using multi-linear principal component analysis. *Optics Express*. 2018;26;11804-11818.
- [27] J. Cheng, Y. Zhao, Y. Hu, J. Liu. Pixel Reconstruction For Speckle Reduction In 3D Optical Coherence Tomography Of Retina. *IEEE 16th International Symposium on Biomedical Imaging (ISBI)*. 2019;1424-1427.
- [28] S.Y. Yoo, Z. Wang, J. M. Seo. Adaptive Weighted Nuclear Norm Minimization for Removing Speckle Noise from Optical Coherence Tomography Images. *41st Annual International Conference of the IEEE Engineering in Medicine and Biology Society (EMBC)*. 2019; 2687-2690.
- [29] L. Husvogt, S. B. Ploner, S. Chen, D. Stromer, J. Schottenhamml, A. Y. Alibhai, E. Moulton, N. K. Waheed, J. G. Fujimoto, A. Maier. Maximum a posteriori signal recovery for optical coherence tomography angiography image generation and denoising. *Biomedical Optics Express*. 2021;12;55-68.
- [30] S. Chitchian, M. A. Mayer, A. Boretsky, F. J. Kuijk, M. Motamedi. Retinal optical coherence tomography image enhancement via shrinkage denoising using double-density dual-tree complex wavelet transform. *Journal of Biomedical Optics*. 2012;17; 116009.
- [31] I. Kopriva, F. Shi, X. Chen. Enhanced low rank + sparsity decomposition for speckle reduction in optical coherence tomography. *Journal of Biomedical Optics*. 2016;21;076008.
- [32] Y. Hu, C. Tang, M. Xu, Z. Lei. Selective retinex enhancement based on the clustering algorithm and block-matching 3D for optical coherence tomography images. *Applied Optics*. 2019;58;9861-9869.
- [33] M. Huang, L. Zeng, Y. Zhang, Y. Li, Z. Ni, D. Wu, S. Feng. Image Noise Recognition Algorithm Based on Improved DenseNet. *Web Information Systems and Applications*. 2021;455-467.
- [34] D. Hu, Y. K. Tao, I. Oguz. Unsupervised denoising of retinal OCT with diffusion probabilistic model. *Medical Imaging 2022: Image Processing*. 2022;12032;1203206.
- [35] Q. Yan, B. Chen, Y. Hu, J. Cheng, Y. Gong, J. Yang, J. Liu, Y. Zhao. Speckle reduction of OCT via super resolution reconstruction and its application on retinal layer segmentation. *Artificial Intelligence in Medicine*. 2020;106;101871.
- [36] P. K. Gupta and F. Husain. A De-Speckling Framework for Optical Coherence Tomography Images. *Proceedings of Trends in Electronics and Health Informatics*. 2022;207-215.

- [37] Z. Huang, C. Tang, M. Xu, Y. Shen, Z. Lei. Both speckle reduction and contrast enhancement for optical coherence tomography via sequential optimization in the logarithmic domain based on a refined Retinex model. *Applied Optics*. 2020;59;11087-11907.
- [38] Y. Hu, J. Ren, J. Yang, R. Bai, J. Liu. Noise reduction by adaptive-SIN filtering for retinal OCT images. *Scientific Reports*. 2021;11;19498.
- [39] D. Li, W. Yu, K. Wang, D. Jiang, Q. Jin. Speckle noise removal based on structural convolutional neural networks with feature fusion for medical image. *Signal Processing: Image Communication*. 2021;99;116500.
- [40] A. P. S., V. P. Gopi, P. Palanisamy. Despeckling of OCT images using DT-CWT based fusion technique. *Optik*. 2022;263;169332.
- [41] Z. Amini, R. Kafieh, H. Rabbani. Speckle Noise Reduction and Enhancement for OCT Images. *Retinal Optical Coherence Tomography Image Analysis*. 2019;39-72.
- [42] X. Yu, C. Ge, Z. Fu, M. Z. Aziz, L. Liu. A two-step filtering mechanism for speckle noise reduction in OCT images. *IEEE 9th International Conference on Information, Communication and Networks (ICICN)*. 2021;501-505.
- [43] P. Guo, D. Li, X. Li. Deep OCT image compression with convolutional neural networks. *Biomedical Optics Express*. 2020;11;3543-3554.
- [44] X. Wu, D. Gao, D. Borroni, S. Madhusudhan, Z. Jin, Y. Zheng. Cooperative Low-Rank Models for Removing Stripe Noise From OCTA Images. *IEEE Journal of Biomedical and Health Informatics*. 2020;24;3480-3490.
- [45] V. Das, S. Dandapat, P. K. Bora. A diagnostic information-based framework for super-resolution and quality assessment of retinal OCT images. *Computerized Medical Imaging and Graphics*. 2021;94;101997.
- [46] F. Schirmacher, T. Köhler, L. Husvogt, J. G. Fujimoto, J. Hornegger, A. K. Maier. QuaSI: Quantile Sparse Image Prior for Spatio-Temporal Denoising of Retinal OCT Data. *Medical Image Computing and Computer-Assisted Intervention – MICCAI*. 2017;93-91.
- [47] S Huang, C. Tang, M. Xu, Z. Lei. Cluster-based filtering framework for removing speckles with structural protection in OCT images. *Applied Physics B*. 2021;127;149.
- [48] T. K. Yoo, J. Y. Choi, H. K. Kim. CycleGAN-based deep learning technique for artifact reduction in fundus photography. *Graefe's Archive for Clinical and Experimental Ophthalmology*. 2020;258;1631-1637.
- [49] Z. Dong, G. Liu, G. Ni, J. Jerwick, L. Duan, C. Zhou. Optical coherence tomography image de-noising using a generative adversarial network with speckle modulation. *Biophotonics*. 2020;13;e201960135.
- [50] Y. Xu, Y. Su, D. Hua, P. Heiduschka, W. Zhang, T. Cao, J. Liu, Z. Ji, N. Eter. Enhanced Visualization of Retinal Microvasculature via Deep Learning on OCTA Image Quality. *Dis Markers*. 2021;1373362.
- [51] S. N. Menon, V. B. V. Reddy, A. Yeshwanth, B. N. Anoop, J. Rajan. A Novel Deep Learning Approach for the Removal of Speckle Noise from Optical Coherence Tomography Images Using Gated Convolution–Deconvolution Structure. *Proceedings of 3rd International Conference on Computer Vision and Image Processing*. 2019;115-126.
- [52] G. Gisbert, N. Dey, H. Ishikawa, J. Schuman, J. Fishbaugh, G. Gerig. Self-supervised Denoising via Diffeomorphic Template Estimation: Application to Optical Coherence Tomography. *Ophthalmic Medical Image Analysis (OMIA)*. 2020;72-82.
- [53] S.K. Devalla, G. Subramanian, T. H. Pham, X. Wang, S. Perera, T. A. Tun, T. Aung, L. Schmetterer, A. H. Thiery and M. J. A. Girard. A Deep Learning Approach to Denoise Optical Coherence Tomography Images of the Optic Nerve Head. *Scientific Reports*. 2019;9; 14454.
- [54] H. Cheong, S. K. Devalla, T. Chuangsuwanich, T. A. Tun, X. Wang, T. Aung, L. Schmetterer, M. L. Buist, C. Boote, A. H. Thiery and M. A. Girard. OCT-GAN: single step shadow and noise removal from optical coherence tomography images of the human optic nerve head. *Biomedical optics express*. 2021;12;1482-1498.
- [55] C. Tian, J. Yang, P. Li, S. Zhang and S. Mi. Retinal fundus image superresolution generated by optical coherence tomography based on a realistic mixed attention GAN. *Medical Physics*. 2022;49;3185-31998.
- [56] D. Hu, J. D. Malone, Y. Atay, Y. K. Tao and I. Oguz. Retinal OCT Denoising with Pseudo-Multimodal Fusion Network. *OMIA 2020: Ophthalmic Medical Image Analysis*. 2020; 125-135.
- [57] N. Akter, S. Perry, J. Fletcher, M. Simunovic, M. Roy. Automated Artifacts and Noise Removal from Optical Coherence Tomography Images Using Deep Learning Technique. *2020 IEEE Symposium Series on Computational Intelligence (SSCI)*. 2020;2536-2542.
- [58] K. Halupka, B. Antony. M. Lee, K. Lucy, R. Rai, H. Ishikawa, G. Wollstein, J. Schuman and R. Garnavi. Retinal optical coherence tomography image enhancement via deep learning. *Biomedical optics express*. 2018;9;6205-6221.
- [59] X. Wei, X. Liu, A. Yu, T. Fu, D. Liu. Clustering-Oriented Multiple Convolutional Neural Networks for Optical Coherence Tomography Image Denoising. *11th International Congress on Image and Signal Processing, BioMedical Engineering and Informatics (CISP-BMEI)*. 2018:1-5.

- [60] Z. Chen, Z. Zheng, H. Shen, Z. Zheng, P. Dai, P. Ouyang. DN-GAN: Denoising generative adversarial networks for speckle noise reduction in optical coherence tomography images. *Biomedical Signal Processing and Control*. 2020;55;101632.
- [61] N. Gour and P. Khanna. Speckle denoising in optical coherence tomography images using residual deep convolutional neural network. *Multimedia Tools and applications*. 2020;79;15679-15695.
- [62] M. J. Hasan, M. S. Alom, U. Fatema, M. F. Wahid. Deep Learning Based Retinal OCT Image Denoising using Generative Adversarial Network. *International Conference on Automation, Control and Mechatronics for Industry 4.0 (ACMI)*. 2021;1-6.
- [63] Y. Ma, X. Chen, W. Zhu, X. Cheng, D. Xiang and F. Shi. Speckle noise reduction in optical coherence tomography images based on edge-sensitive cGAN. *Biomedical Optics Express*. 2018;9;5129-5146.
- [64] A. Guo, L. Fang, M. Qi, S. Li. Unsupervised Denoising of Optical Coherence Tomography Images With Nonlocal-Generative Adversarial Network. *IEEE Transactions on Instrumentation and Measurement*. 2020;70;1-12.
- [65] B. Qiu, Z. Huang, X. Liu, X. Meng, Y. You, G. Liu, K. Yang, A. Maier, Q. Ren, Y. Lu. Noise reduction in optical coherence tomography images using a deep neural network with perceptually sensitive loss function. *Biomedical Optics Express*. 2020;11;817-830.
- [66] Y. Huang, N. Zhang and Q. Hao. Real-time noise reduction based on ground truth free deep learning for optical coherence tomography. *Biomedical Optics Express*. 2021;12;2027-2040.
- [67] K. J. Halupka, B. J. Antony, M. H. Lee, K. A. Lucy, R. S. Sai, H. Ishikawa. G. Wollstein, J. S. Schuman, R. Garnavi. Retinal optical coherence tomography image enhancement via deep learning. *Biomedical Optics Express*. 2018;9;6205-6221.
- [68] B. Qiu, S. Zeng, X. Meng, Z. Jiang, Y. You, M. Geng, Z. Li, Y. Hu, Z. Huang, C. Zhou, Q. Ren, Y. Lu. Comparative study of deep neural networks with unsupervised Noise2Noise strategy for noise reduction of optical coherence tomography images. *Journal of Biophotonics*. 2021;14; e202100151.
- [69] A. Abbasi, A. Monadjemi, L. Fang, H. Rabbanni, Y. Zhang. Three-dimensional optical coherence tomography image denoising through multi-input fully convolutional networks. *Computers in Biology and Medicine*. 2019;108;1-8.
- [70] N. A. Kande, R. Dakhane, A. Dukkupati, P. K. Yalavarthy. SiameseGAN: A Generative Model for Denoising of Spectral Domain Optical Coherence Tomography Images. *IEEE Transactions on Medical Imaging*. 2021;40;180-192.
- [71] B. Qiu, Y. You, Z. Huang, X. Meng, Z. Jiang, C. Zhou, G. Liu, K. Yang, Q. Ren, Y. Lu. N2NSR-OCT: Simultaneous denoising and super-resolution in optical coherence tomography images using semisupervised deep learning. *Journal of Biophotonics*. 2020;14; e202000282.
- [72] F. Shi, N. Cai, Y. Gu, D. Hu, Y. Ma, Y. Chen and X. Chen. DeSpecNet: a CNN-based method for speckle reduction in retinal optical coherence tomography images. *Physics in Medicine & Biology*. 2019;64;175010.
- [73] Y. Huang, W. Xia, Z. Lu, Y. Liu, H. Chen, J. Zhou, L. Fang, Y. Zhang. Noise-Powered Disentangled Representation for Unsupervised Speckle Reduction of Optical Coherence Tomography Images. *IEEE Transactions on Medical Imaging*. 2021;40;2600-2614.
- [74] A. Yu, X. Liu, X. Wei, T. Fu, D. Liu. Generative Adversarial Networks with Dense Connection for Optical Coherence Tomography Images Denoising. *11th International Congress on Image and Signal Processing, BioMedical Engineering and Informatics (CISP-BMEI)*. 2019;1-5.
- [75] M. Tajmiriahi, R. Kafieh, Z. Amini, H. Rabbani. A Lightweight Mimic Convolutional Auto-Encoder for Denoising Retinal Optical Coherence Tomography Images. *IEEE Transactions on Instrumentation and Measurement*. 2021;70;1-8.
- [76] S. Sengupta, A. Singh, V. Lakshminarayanan. EdgeWaveNet: edge aware residual wavelet GAN for OCT image denoising. *Medical Imaging 2021: Imaging Informatics for Healthcare, Research, and Applications*. 2021;11601;110-115.
- [77] M. Mehdizadeh, C. MacNish, D. Xiao, D. Alonso-Caneiro, J. Kugelman, M. Bennamoun. Deep feature loss to denoise OCT images using deep neural networks. *Biomedical Optics*. 2021;26;046003.
- [78] N. Cai, F. Shi, D. Hu, Y. Chen. A ResNet-based universal method for speckle reduction in optical coherence tomography images. *Proc. IEEE Int. Symp. Biomed. Imaging (ISBI)*. 2018.
- [79] Q. Zhou, M. Wen, M. Ding, and X. Zhang. Unsupervised despeckling of optical coherence tomography images by combining cross-scale CNN with an intra-patch and inter-patch-based transformer. *Optics Express*. 2022;30;18800-18820.
- [80] B.N. Anoop, K. S. Kalmady, A. Udathu, V. Siddharth, G. N. Girish, A. R. Kothari, J. Rajan. A cascaded convolutional neural network architecture for despeckling OCT images. *Biomedical Signal Processing and Control*. 2021;66;102463.
- [81] Z. Fu, X. Yu, C. Ge, M. Z. Aziz, L. Liu. ADGAN: An Asymmetric Despeckling Generative Adversarial Network for Unpaired OCT Image Speckle Noise Reduction. *IEEE 6th Optoelectronics Global Conference (OGC)*. 2021;212-216.
- [82] M. Wang, W. Zhu, K. Yu, Z. Chen, F. Shi, X. Chen. Semi-Supervised Capsule cGAN for Speckle Noise Reduction in Retinal OCT Images. *IEEE Transactions on Medical Imaging*. 2021;40;1168-1183.



- [83] Y. Zhou, K. Yu, M. Wang, Y. Ma, Y. Peng, Z. Chen, W. Zhu, F. Shi, X. Chen. Speckle Noise Reduction for OCT Images Based on Image Style Transfer and Conditional GAN. *IEEE Journal of Biomedical and Health Informatics*. 2022;26;139-150.
- [84] Y. Zhou, J. Li, M. Wang, W. Zhu, Y. Peng, Z. Chen, L. Wang, T. Wang, C. Yao, T. Wang and X. Chen. High-Resolution Hierarchical Adversarial Learning for OCT Speckle Noise Reduction. *MICCAI 2021: Medical Image Computing and Computer Assisted Intervention*. 2021;372-381.
- [85] M. Wu, W. Chen, Q. Chen, H. Park. Noise Reduction for SD-OCT Using a Structure-Preserving Domain Transfer Approach. *IEEE Journal of Biomedical and Health Informatics*. 2021;25;3460-3472.
- [86] V. Das, S. Dandapat, P. K. Bora. Unsupervised Super-Resolution of OCT Images Using Generative Adversarial Network for Improved Age-Related Macular Degeneration Diagnosis. *IEEE Sensors Journal*. 2020;20;8746-8756.
- [87] Y. Huang, Z. Lu, Z. Shao, M. Ran, J. Zhou, L. Fang, Y. Zhang. Simultaneous denoising and super-resolution of optical coherence tomography images based on generative adversarial network. *Optics Express*. 2019;27;12289-12307.
- [88] C. Ge, X. Yu, M. Li, J. Mo. Self-Supervised Denoising of single OCT image with Self2Self-OCT Network. *IEEE 7th Optoelectronics Global Conference (OGC)*. 2022:200-204.
- [89] Z. Ma, Q. Xie, F. Fan, J. Zhu. DSGAN: a generative model for speckle noise reduction in retinal optical coherence tomography images. *Proc. SPIE 12320, Optics in Health Care and Biomedical Optics XII*. 2022:123201H.
- [90] K. Xie, M. Luo, H. Chen, M. Yang, Y. He, P. Liao and Y. Zhang. Speckle denoising of optical coherence tomography image using residual encoder–decoder CycleGAN. *Signal, Image and Video Processing*. 2022:1-13.
- [91] Q. Xie, Z. Ma, L. Zhu, F. Fan, X. Meng, X. Gao and J. Zhu. Multi-task generative adversarial network for retinal optical coherence tomography image denoising. *Physics in Medicine & Biology*. 2022;68;045002.
- [92] H. Ahmed, Q. Zhang, R. Donnan and A. Alomainy. Unsupervised Region-Based Denoising for Optical Coherence Tomography Framework. *International Conference on Computational Intelligence and Applications (ICCIA)*. 2022:267-273.
- [93] H. Ahmed, Q. Zhang, R. Donnan and A. Alomainy. Framework of Unsupervised based Denoising for Optical Coherence Tomography. *International Conference on Biomedical Signal and Image Processing (ICBIP)*. 2022:19-24.
- [94] H. Ahmed, Q. Zhang, R. Donnan and A. Alomainy. Attention Based Speckle Reduction for Optical Coherence Tomography in Ophthalmology and Dentistry. *International Congress on Image and Signal Processing, BioMedical Engineering and Informatics (CISP-BMEI)*. 2022:1-6.
- [95] Q. Zhou, M. Wen, B. Yu, C. Lou, M. Ding, X. Zhang. Self-supervised transformer based non-local means despeckling of optical coherence tomography images. *Biomedical Signal Processing and Control*. 2023;80;104348.
